# Supplementary material for: Are floating algal mats a refuge from hypoxia for estuarine invertebrates?
Source: PeerJ. 2017 Mar 23;5:e3080. doi: 10.7717/peerj.3080 (PMC5366062; doi:10.7717/peerj.3080)
Supplement: Data S1 — S1 - Raw data for taxa sampled, along with sampling month and estuary for the 2013 mat survey (Table 1) and the 2014 natural experiment. [file peerj-05-3080-s001.xlsx]

## Sheet: 2013
Data are square-root transformed
Site	Month	Type	Ephydridae	Orthocladiinae	Chironomini	Vespidae	Curculionidae	Argulus	Hydrophilidae	Tipuloidea	Elmidae	Ceratopogonidae	Dytiscidae	Haliplidae	Gerridae	Corixidae	Limnesiidae	Spirorbis spirorbis	N. obsoletus	Hydrobiidae	Cerithiidae	Pyramidellidae	Littorina spp	G. mucronatus	G. lawrencianus	G. oceanicus	Ampithoidae	Corophiidae	Jaera spp.	Palaemon	Nereidae	Capitellidae	Mya arenaria	Gemma gemma	Mytilidae	Naididae	Acteocina sp.	Astyris lunata	Leptocheliidae	Crangon septemspinosa	Nephtys	Orbiniidae	Spionidae	Pectinariidae	Terebellidae	Polynoidae	Crassostrea virginica
Stanley	July	Floating	0.229416	0	0	0	0.229416	0.229416	0	0	0	0	0	0	0	0	0	0	0	0.82717	0	0	0	4.25503	10.7312	0.39736	0	0.324443	0	0	0	0	0	0	1.68585	0	0	0	0	0	0	0	0	0	0	0	0
Stanley	July	Floating	0	1.25656	0.229416	0	0	0	0	0	0	0	0	0	0	0	0	0	0	2.05196	0	0	0	0.945905	5.24655	0.229416	0	0	0	0	0	0	0	0	0.39736	0	0	0	0	0	0	0	0	0	0	0	0
Stanley	July	Floating	0	0	0	0	0.458831	0	0	0	0	0	0	0	0	0	0	0	0	0.917663	0	0	0	1.05131	1.70139	0	0	0	0	0	0.229416	0	0	0	0	0	0	0	0	0	0	0	0	0	0	0	0
Stanley	August	Floating	0	0	0	0	0	0	0.228695	0	0	0	0	0	0	0	0	0	0	1.9134	0	0	0	0.758494	1.51699	0.228695	0	0	0	0	0	0	0	0	0	0	0	0	0	0	0	0	0	0	0	0	0
Stanley	August	Floating	0	0.554132	0	0	0	0	0	0	0	0	0	0	0	0	0	0	0	1.03669	0	0	0	0.391831	0.678671	0	0	0	0	0	0	0	0	0	0	0	0	0	0	0	0	0	0	0	0	0	0
Stanley	August	Floating	0	0.249922	0.249922	0	0	0	0	0	0	0	0	0	0	0	0	0	0.249922	8.33406	0	0	0	0.790322	0.967943	0	0	0	0	0	0	0	0	0	0.558842	0	0	0	0	0	0	0	0	0	0	0	0
Wheatley	June	Floating	0	0	0	0	0	0	0	0	0	0	0	0	0	0	0	0	0	1.5011	0	0.197104	0.623298	1.5011	0.440738	0	0	0.341394	0	0	0.394208	0	0	0	0	0	0	0	0	0	0	0	0	0	0	0	0
Wheatley	June	Floating	0	0	0	0	0	0	0	0	0	0	0	0	0	0	0	0	0	0	0	0	0	0.45847	0	0	0	0	0	0	0	0	0	0	0	0	0	0	0	0	0	0	0	0	0	0	0
Wheatley	June	Floating	0	0	0	0	0	0	0	0	0	0	0	0	0	0	0	0	0	1.25546	0	0	0	0.836974	4.42885	0	0	0	0	0	0	0	0	0	0	0	0	0	0	0	0	0	0	0	0	0	0
Wheatley	June	Floating	0	0	0	0	0	0	0	0	0	0	0	0	0	0	0	0	0	1.12651	0	0	0	0.356235	0	0	0	0	0	0	0	0	0	0	0	0	0	0	0	0	0	0	0	0	0	0	0
Wheatley	July	Floating	0.383878	0.242786	0	0	0	0	0	0	0	0	0	0	0	0	0	0	0	0	0	0	0.171675	2.5231	0.823326	0	0	0	0	0	0	0.171675	0	0	0	0.171675	0	0	0	0	0	0	0	0	0	0	0
Wheatley	July	Floating	0	0.247689	0	0	0	0	0	0	0	0	0	0	0	0	0	0	0	0.926766	0	0	0	2.18753	0.743066	0	0	0	0	0	0	0	0	0	0	0	0	0	0	0	0	0	0	0	0	0	0
Wheatley	July	Floating	0	0.19838	0	0	0	0	0	0	0	0	0	0	0	0	0	0	0	0.74227	0	0	0.19838	2.26188	1.13961	0	0	0	0	0	0	0	0	0	0	0	0	0	0	0	0	0	0	0	0	0	0
Wheatley	August	Floating	0.282054	0	0	0	0	0	0	0	0	0	0	0	0	0	0	0	0	1.01696	0	0.797769	0.282054	0.891933	0	0	0	0	0	0	0.746245	0	0	0	0	0	0	0	0	0	0	0	0	0	0	0	0
Wheatley	August	Floating	0	0	0	0	0	0	0	0	0	0	0	0	0	0	0	0	0	3.25204	0.766514	0.593739	0	2.58805	0	0	0	0	0	0	0	0	0	0	0	0	0	0	0	0	0	0	0	0	0	0	0
Wheatley	August	Floating	0.454264	0	0	0	0	0	0	0	0	0	0	0	0	0	0	0	0	0.454264	0	0	0	1.30081	0.497621	0	0	0	0	0	0	0	0	0	0	0	0	0	0	0	0	0	0	0	0	0	0
Souris	July	Floating	0	0	0	0	0	0	0	0	0	0	0	0	0	0	0	0	0	0	0	0	0	1.03685	3.66581	0	0	0.423292	0.282194	0	0	0	0	0.244388	0	0	0	0	0	0	0	0	0	0	0	0	0
Souris	July	Floating	0	0	0	0	0	0	0	0	0	0	0	0	0	0	0	0	0	0	0	0	0	0.330109	4.48187	0	0	0.426169	0.330109	0	0	0	0	0.269533	0	0	0	0	0	0	0	0	0	0	0	0	0
Souris	July	Floating	0	0	0	0	0	0	0	0	0	0	0	0	0	0	0	0	0	0.147059	0	0	0	0.930082	2.85158	0	0	0	0	0	0	0	0	0	0	0	0	0	0	0	0	0	0	0	0	0	0
Souris	June	Floating	0	0	0.223523	0	0	0	0.158055	0.158055	0.158055	0.158055	0	0	0	0	0	0	0	0	0	0	0	1.10638	8.33354	0	0.316109	0	0.474164	0	0	0	0	0	0	0	0	0	0	0	0	0	0	0	0	0	0
Souris	June	Floating	0	0	0.232558	0	0	0	0	0	0	0	0	0	0	0	0	0	0	0	0	0	0	1.677	6.91445	0	0	0	0.232558	0	0	0	0	0	0	0	0	0	0	0	0	0	0	0	0	0	0
Souris	June	Floating	0	0	0	0	0	0	0	0	0	0	0	0	0	0	0	0	0	0.413714	0	0	0	1.15173	8.40258	0	0.65414	0	0.547293	0	0	0	0	0	0	0	0	0	0	0	0	0	0	0	0	0	0
Montague	July	Floating	0	0	0.20795	0	0	0	0	0	0	0	0	0	0	0	0	0	0	1.0905	0	0	0.550184	0.20795	0.588172	0.20795	0	0	0.147043	0	0	0	0	0	0	0	0	0	0	0	0	0	0	0	0	0	0
Montague	July	Floating	0	0.217084	0	0	0	0	0.217084	0	0	0	0	0	0	0	0	0	0.307003	4.00283	0	0	2.35813	0	0.217084	0.686479	0.307003	0	0	0	0	0	0	0	0	0	0	0	0	0	0	0	0	0	0	0	0
Montague	July	Floating	0	0	0	0	0	0	0	0	0	0	0	0	0	0	0	0	0	0.627456	0	0	0	0	0	0	0	0	0	0	0	0	0	0	0	0	0	0	0	0	0	0	0	0	0	0	0
Murray	June	Floating	0	0	0	0.246108	0	0	0	0	0	0	0	0	0	0	0	0	0	1.65095	0	0	0	1.18029	0	0	0	0.34805	0	0.492217	0	0.246108	0	0	0	0.246108	0	0	0	0	0	0	0	0	0	0	0
Murray	June	Floating	0	0	0	0	0	0	0	0	0	0	0	0	0	0	0	0.266123	0	0.798369	0	0	0	0.376355	0	0	0	0.532246	0	0	0	0	0	0	0	0	0	0	0	0	0	0	0	0	0	0	0
Murray	June	Floating	0	0	0	0	0	0	0	0	0	0	0.313189	0	0	0	0	0	0	1.29131	0	0	0	0.965313	0	0	0	0.495195	0	0	0	0	0	0	0	0	0	0	0	0	0	0	0	0	0	0	0
Murray	July	Floating	0	0	0	0	0	0	0	0	0	0	0.142393	0	0	0	0	0	0.513405	0.472264	0	0	0	0.246632	0.450286	0	0	0.830286	0	0	0	0	0	0.3184	0.376736	0	0	0	0	0	0	0	0	0	0	0	0
Murray	July	Floating	0	0	0	0	0	0	0.127062	0	0	0	0	0.127062	0.127062	0.127062	0	0	0.127062	1.53002	0	0	0	0.475421	0.852355	0	0	1.53529	0	0	0	0	0.475421	0	0.523888	0	0	0	0	0	0	0	0	0	0	0	0
Murray	July	Floating	0	0	0	0	0	0	0.134449	0	0	0	0.134449	0.134449	0	0	0.134449	0	0	0	0	0	0	0.91188	1.30354	0	0	1.28257	0	0	0	0	0.134449	0	0.554349	0	0	0	0	0	0	0	0	0	0	0	0
Kildare	June	Floating	0	0	0.158055	0	0.158055	0	0	0	0	0	0	0	0	0.158055	0	0	0	1.08357	0	0	0	1.02431	0	0	0	0.774306	0	0	0	0	0	0	0	0	0	0	0	0	0	0	0	0	0	0	0
Kildare	June	Floating	0	0	0	0	0	0	0	0	0	0	0	0	0	0	0	0	0	1.4624	0	0	0	1.12576	0	0	0	0.974933	0	0	0	0	0	0	0.344691	0	0	0	0	0	0	0	0	0	0	0	0
Kildare	June	Floating	0	0	0	0	0	0	0	0	0	0	0	0	0	0	0	0	0	1.23241	0	0	0	0.779444	0	0	0	3.37959	0	0	0.348578	0	0	0	0.348578	0	0	0	0	0	0	0	0	0	0	0	0
Kildare	June	Floating	0	0	0	0	0	0	0	0	0	0	0	0	0	0	0	0	0	0.858194	0	0	0	0.57213	0	0	0	1.43032	0	0	0	0	0	0	0	0	0	0	0	0	0	0	0	0	0	0	0
Kildare	July	Floating	0	0	0	0	0	0	0	0	0	0	0	0	0	0	0	0	0.193528	1.20858	0	0	0.432742	0.61199	0	0	0	0.670402	0	0	0.27369	0	0.432742	0	0.697776	0	0	0	0	0	0	0	0	0	0	0	0
Kildare	July	Floating	0	0	0	0	0	0	0	0	0	0	0	0	0	0	0	0	0	1.33235	0	0	0.543928	1.90375	0.666173	0.271964	0	1.53846	0	0	0.666173	0	0	0	0.815892	0	0	0	0	0	0	0	0	0	0	0	0
Kildare	July	Floating	0	0.208243	0	0	0	0	0	0	0	0	0	0	0	0	0	0	0	0.931291	0	0	0	3.20586	1.767	0.2945	0	1.10192	0	0	0	0.208243	0	0	0.658522	0.208243	0	0	0	0	0	0	0	0	0	0	0
Mill	July	Floating	0	0.376022	0	0	0	0	0	0	0	0	0	0	0	0	0	0	0	0.623562	0	0	0	0.728164	1.31608	0	0	0.420406	0	0	0	0	0.188011	0	0.265888	0	0	0	0	0	0	0	0	0	0	0	0
Mill	July	Floating	0	0.322162	0	0	0	0	0	0	0	0	0	0	0	0	0	0	0	0.60271	0	0	0	0.939255	0.455606	0	0	0.509383	0	0	0	0	0	0	0	0	0	0	0	0	0	0	0	0	0	0	0
Mill	July	Floating	0	0.787877	0	0	0	0	0	0	0	0	0	0	0	0	0	0	0	0.486288	0	0	0	0.708881	0.570224	0	0	0.29779	0	0	0.171929	0.171929	0	0	0.171929	0.171929	0	0	0	0	0	0	0	0	0	0	0
Montague	July	Submerged	0	0	0	0	0	0	0	0	0	0	0	0	0	0	0	0	0.71047	8.5781	3.04205	1.18412	0.626575	0	0	0.947293	0	0	0.236823	0	0	0	0	0	0	0	0	0	0	0	0	0	0	0	0	0	0
Montague	July	Submerged	0	0	0	0	0	0	0	0	0	0	0	0	0	0	0	0	0.785674	4.30331	0	1.0143	0.96225	0	0	0.785674	0	0	0.32075	0	0	0	0	0.32075	0	0.32075	0	0	0	0	0	0	0	0	0	0	0
Montague	July	Submerged	0	0	0	0	0	0	0	0	0	0	0	0	0	0	0	0	0.510976	4.75693	0	0	1.38373	0	0	1.979	0	0.834421	0	0	0	0	0	0	0	0	0	0	0	0	0	0	0	0	0	0	0
Montague	July	Submerged	0	0	0	0	0	0	0	0	0	0	0	0	0	0	0	0	0.885615	4.53743	0	0	1.43486	0.221404	0	1.12894	0	0.495074	0	0	0	0	0.221404	0	0	0	0	0	0	0	0	0	0	0	0	0	0
Montague	July	Submerged	0	0	0	0	0	0	0	0	0	0	0	0	0	0	0	0	0.877219	2.2971	0	0	0.877219	0	0	0.765699	0	0.191425	0.270716	0	0	0	0.191425	0	0	0	0	0	0	0.191425	0	0	0	0	0	0	0
Kildare	June	Submerged	0	0	0.367359	0	0	0	0	0	0	0	0	0	0	0	0	0	0	2.86917	1.55857	0	0	1.27257	0.899843	0	0	3.95658	0	0	0	0	0	0	0.367359	0	0	0	0	0	0	0	0	0	0	0.367359	0
Kildare	June	Submerged	0	0	0	0	0	0	0	0	0	0	0	0	0	0	0	0	0	1.50824	0	0	0	1.27979	0	0	0	4.91974	0	0	0	0	0	0	0	0	0	0	0	0	0.301648	0	0	0	0	0	0
Kildare	June	Submerged	0	0	0	0	0	0	0	0	0	0	0	0	0	0	0	0	0	3.91282	0.826427	0	0	1.48986	0.584372	0	0	2.70962	0	0	0	0	0	0.337388	0	0	0	0	0	0	0	0	0	0	0	0	0
Kildare	June	Submerged	0	0	0	0	0	0	0	0	0	0	0	0	0	0	0	0	0	3.15057	1.45325	0	0	1.80928	0.562841	0	0	2.68949	0	0	0	0	0	0	0	0	0	0	0	0	0	0	0	0	0	0	0
Kildare	June	Submerged	0	0	0	0	0	0	0	0	0	0	0	0	0	0	0	0	0	4.49277	1.25611	0	0	1.18936	0.233253	0	0	2.1631	0	0	0	0	0	0.233253	0	0	0	0	0	0	0	0	0	0	0	0	0
Kildare	July	Submerged	0	0	1.18097	0	0	0	0	0	0	0	0	0	0	0	0	0	0	3.27707	0	1.12037	0	3.48337	0	0	0	2.17761	0	0	0.988074	0	1.34652	0.646846	0	0	0	0	0	0	0.528148	0	0.373457	0.373457	0	0	0
Kildare	July	Submerged	0	0	0.469065	0	0	0	0	0	0	0	0	0	0	0	0	0	0	2.52599	0.777856	0.703598	0	2.40324	0	0	0	1.07476	0	0	0	0	0.663358	0.331679	0.234533	0	0.234533	0	0	0	0.331679	0	0	0	0	0	0
Kildare	July	Submerged	0	0	0.420827	0	0	0	0	0	0	0	0	0	0	0	0	0	0	1.882	0	0.543286	0	2.07589	0.768322	0	0	2.31774	0	0	0	0	0.343604	0	0.343604	0	0.343604	0	0	0	0	0	0	0	0	0.242965	0
Kildare	July	Submerged	0	0	0.423714	0	0	0	0	0	0	0	0	0	0	0	0	0	0	2.39689	0.518941	0	0	3.94076	1.49805	0	0	2.64609	0	0	0.299611	0.299611	0	0.66995	0.299611	0	0	0	0	0	0.299611	0	0	0	0	0.299611	0
Kildare	July	Submerged	0	0	0.377426	0	0	0	0	0	0	0	0	0	0	0	0	0	0	2.6688	0.377426	0	0	4.0032	1.3344	0	0	2.72166	0	0	0.377426	0	1.10038	0	0.706099	0	0	0	0	0	0	0	0	0	0	0.377426	0
Murray	June	Submerged	0	0	0	0	0	0	0	0	0	0	0	0	0	0	0	0	0.727743	3.6782	0	0	0	1.72774	0.930932	1.05231	0	1.55155	0	0	0	0	0	0	0	0	0	0	0	0	0	0	0	0	0	0	0
Murray	June	Submerged	0	0	0	0	0	0	0	0	0	0	0	0	0	0	0	0	0.309789	2.39962	0	0	0	1.54895	0.692709	0.53657	0	0.692709	0	0	0	0	0	0	0	0	0	0	0	0	0	0	0	0	0	0	0
Murray	June	Submerged	0	0	0	0	0	0	0	0	0	0	0	0	0	0	0	0	0.319765	2.53805	0	0	0	2.69439	2.87788	0.452216	0	1.75142	0	0	0	0	0	0	0	0	0	0	0	0	0	0	0	0	0	0	0
Murray	June	Submerged	0	0	0	0	0	0	0	0	0	0	0	0	0	0	0	0	0.547176	2.59548	0	0	0	1.44769	0.865161	0	0	1.22352	0	0	0	0	0	0	0	0	0	0	0	0	0	0	0	0	0	0	0
Murray	June	Submerged	0	0	0	0	0	0	0	0	0	0	0	0	0	0	0	0	0.733517	3.8416	0	0	0	1.27049	1.77522	0	0	1.4406	0	0	0	0	0	0	0	0	0	0	0	0	0	0	0	0	0	0	0
Murray	July	Submerged	0	0	0.16824	0	0	0	0	0	0	0	0	0	0	0	0	0	0.921486	1.2248	0	0	0	1.09032	1.0371	1.63114	0	1.49535	0	0	0.336479	0.237927	0	0	0	0	0.2914	0	0	0	0.16824	0	0	0	0	0	0
Murray	July	Submerged	0	0	0	0	0	0	0	0	0	0	0	0	0	0	0	0	0.215026	1.48975	0	0	0	3.37804	4.51863	1.89906	0	2.41749	0	0	0.396489	0.372437	0	0	0	0	0.166559	0	0	0	0.192325	0.135995	0.166559	0	0.135995	0	0
Murray	July	Submerged	0	0	0	0	0	0	0	0	0	0	0	0	0	0	0	0	0	1.33158	0	0	0	0.909013	2.86555	0.524819	0	1.05781	0	0	0.131205	0.321385	0	0	0.681759	0	0	0	0	0	0	0	0	0	0	0	0
Murray	July	Submerged	0	0	0	0	0	0	0	0	0	0	0	0	0	0	0	0	0.522301	3.12134	0	0	0	1.5669	3.34436	3.19538	0	3.90355	0	0	0.394822	0.987056	0	0	0.654739	0	0.197411	0	0	0	0.394822	0	0	0	0	0	0
Murray	July	Submerged	0	0	0	0	0	0	0	0	0	0	0	0	0	0	0	0	0.973297	4.98666	0	0	1.57692	0.243324	0	1.24071	0	0.544089	0	0	0.486648	0	0	0	0	0	0	0	0	0	0	0	0	0	0	0	0
Stanley	July	Submerged	0	0	1.35943	0	0	0	0	0	0	0	0	0	0	0	0	0	0.784867	9.49749	0	0	0	0.382976	0	0	0	0	0.296652	0	0	0	0.484431	0	0.953602	0	0	0	0.171272	0	0.640841	0	0	0	0	0	0
Stanley	July	Submerged	0	0	1.34315	0	0	0	0	0	0	0	0	0	0	0	0	0	0.529091	7.77802	0	0	0	0.249416	0	0	0	0.305471	0.176364	0	0	0	1.41091	0	3.94362	0	0	0	0	0	0.683054	0	0	0	0	0	0
Stanley	July	Submerged	0	0	1.61493	0	0	0	0	0	0	0	0	0	0	0	0	0	0.285481	5.76644	0	0	0	0	0	0	0	0.403732	0	0	0	0	0.946834	0	4.45936	0	0	0	0	0	1.06817	0	0	0	0	0	0
Stanley	July	Submerged	0	0.301238	4.31307	0	0	0	0	0	0	0	0	0	0	0	0	0	0.426014	12.1395	0	0	0	0.521759	0	0	0	0.301238	0.301238	0	0.301238	0.301238	2.42866	0	3.68939	0	0	0	0	0	0.521759	0	0	0	0	0	0
Stanley	July	Submerged	0	0	1.62248	0	0	0	0	0	0	0	0	0	0	0	0	0	0.654043	8.41112	0	0	0	0	0.181399	0	0	0	0	0	0	0	2.0281	0	4.66728	0	0	0	0	0	0	0	0	0	0	0	0
Stanley	August	Submerged	0	0	1.0249	0	0	0	0	0	0	0	0	0	0	0	0	0	0	3.04034	0	0	0	0	0	0	0	0	0	0	0	0	1.0249	0	0.458349	0	0	0	0	0	0	0	0	0	0	0	0
Stanley	August	Submerged	0	0	0.94632	0	0	0	0	0	0	0	0	0	0	0	0	0	0.4461	2.95909	0	0	0	0.31544	0	0	0	0	0	0	0	0	0	0	0	0	0	0	0	0	0	0	0	0	0	0	0
Stanley	August	Submerged	0	0	0	0	0	0	0	0	0	0	0	0	0	0	0	0	0.252377	1.35909	0	0	0	0	0	0	0	0	0	0	0	0	0.618195	0.504754	0.43713	0	0	0	0	0	0	0	0	0	0	0	0
Stanley	August	Submerged	0	0	0.416787	0	0	0	0	0	0	0	0	0	0	0	0	0	0	1.4236	0	0	0	0.240632	0	0	0	0	0	0	0	0	0	0	0	0	0	0	0	0	0	0	0	0	0	0	0
Stanley	August	Submerged	0	0	0.468807	0	0	0	0	0	0	0	0	0	0	0	0	0	0.937614	2.87085	0	0	0	0.468807	0	0	0	0	0	0	0	0	0.574169	0	0	0	0	0	0	0	0	0	0	0	0	0	0
Wheatley	June	Submerged	0	0	0	0	0	0	0	0	0	0	0	0	0	0	0	0	0	3.15943	1.79928	0	3.81685	1.27228	0.424094	0	0	0.59976	0	0	0	0	0	0	0	0	0	0	0	0	0	0	0	0	0	0	0
Wheatley	June	Submerged	0	0	0	0	0	0	0	0	0	0	0	0	0	0	0	0	0	3.54663	1.49873	0	2.28279	0.423904	0.423904	0	0	0	0	0	0	0	0.299745	0	0	0	0	0	0	0	0	0	0	0	0	0	0
Wheatley	June	Submerged	0	0	0	0	0	0	0	0	0	0	0	0	0	0	0	0	0.31342	1.53544	0.31342	0	1.59813	1.62858	1.08572	0	0	0	0	0	0	0	0.31342	0	0	0	0	0	0	0	0	0	0	0	0	0	0
Wheatley	June	Submerged	0	0	0	0	0	0	0	0	0	0	0	0	0	0	0	0	0	1.54303	0	0	1.54303	3.51866	2.18218	0	0	0.845154	0	0	0	0	0.48795	0	0	0	0	0	0	0	0	0	0	0	0	0	0
Wheatley	June	Submerged	0	0	0	0	0	0	0	0	0	0	0	0	0	0	0	0	0	2.03069	0.76753	0	2.42714	3.41098	2.27038	0.542725	0	0.858124	0	0	0	0	0.542725	0	0	0	0	0	0	0	0	0	0	0	0	0	0
Wheatley	July	Submerged	0	0	0	0	0	0	0	0	0	0	0	0	0	0	0	0	0	1.13401	0	0	0.699926	1.76723	2.86457	0.428615	0	0.925915	0	0	0.428615	0.494922	0	0	0	0	0	0	0	0	0	0	0.247461	0	0	0	0
Wheatley	July	Submerged	0	0	1.43848	0	0	0	0	0	0	0	0	0	0	0	0	0	0	1.62282	0.274307	0	0.671913	1.56379	2.43037	0	0	0.387929	0	0	0.274307	0.335957	0	0	0	0	0	0	0	0	0	0	0	0	0	0	0
Wheatley	July	Submerged	0	0	1.25221	0	0	0	0	0	0	0	0	0	0	0	0	0	0	1.9347	0	0	0	1.9347	3.74314	0	0	0.636124	0	0	0.224904	0.224904	0	0	0	0	0	0	0	0	0	0	0	0	0	0.224904	0
Wheatley	July	Submerged	0	0	0	0	0	0	0	0	0	0	0	0	0	0	0	0	0.231807	2.15593	0.733039	0	0.65565	0.65565	0.969719	0	0	0.401502	0	0	0.231807	0	0	0	0	0	0	0	0	0	0.231807	0	0	0	0	0	0
Wheatley	July	Submerged	0	0	0.223887	0	0	0	0	0	0	0	0	0	0	0	0	0	0	2.3159	0.548408	0	1.45095	1.32453	0.592349	0	0	0	0	0	0.316624	0.316624	0	0.223887	0	0	0	0	0	0	0	0	0	0	0	0	0
Wheatley	August	Submerged	0	0	0.253796	0	0	0	0	0	0	0	0	0	0	0	0	0	0	0.401286	1.23032	0	0.67148	1.42442	0	0	0	0.179461	0	0	0.179461	0	0.401286	0	0	0	0	0	0	0	0	0	0	0	0	0	0
Wheatley	August	Submerged	0	0	0	0	0	0	0	0	0	0	0	0	0	0	0	0	0	0.748296	1.32126	0	0	1.58738	0.405821	0	0	0	0	0	0	0.128332	0.256664	0	0	0	0	0	0	0	0	0	0	0	0	0	0
Wheatley	August	Submerged	0	0	0	0	0	0	0	0	0	0	0	0	0	0	0	0	0	0.45533	0.766435	0	0.52577	1.27438	0.185888	0	0	0	0	0.185888	0.185888	0	0.415658	0	0	0	0	0	0	0	0	0	0	0	0	0	0
Wheatley	August	Submerged	0	0	0	0	0	0	0	0	0	0	0	0	0	0	0	0	0	1.54857	0	0	0.726346	1.35002	0.536442	0	0	0	0	0	0.219001	0.219001	0.438003	0	0	0	0	0	0	0	0	0	0	0	0	0	0
Wheatley	August	Submerged	0	0	0	0	0	0	0	0	0	0	0	0	0	0	0	0	0	1.52454	0.681796	0.241051	0.340898	1.13063	0.241051	0	0	0	0	0	0	0	0	0	0	0	0	0	0	0	0	0	0	0	0	0	0
Souris	July	Submerged	0	0	0	0	0	0	0	0	0	0	0	0	0	0	0	0	0	0	0	0	0	2.47481	5.36222	0	0	0	0	0	0	0	0	0	0	0	0	0	0	0	0	0	0	0	0	0	0
Souris	July	Submerged	0	0	0	0	0	0	0	0	0	0	0	0	0	0	0	0	0	0	0	0	0	1.87552	4.44961	0	0	0	0	0	0	0	0	0	0	0	0	0	0	0	0	0	0	0	0	0	0
Souris	July	Submerged	0	0	0	0	0	0	0	0	0	0	0	0	0	0	0	0	0	0	0	0	0	2.65132	6.80591	0	0	0	0	0	0	0	0	0	0	0	0	0	0	0	0	0	0	0	0	0	0
Souris	July	Submerged	0	0	0	0	0	0	0	0	0	0	0	0	0	0	0	0	0	0	0	0	0	2.31553	5.42126	0	0	0	0	0	0	0	0	0	0	0	0	0	0	0	0	0	0	0	0	0	0
Souris	July	Submerged	0	0	0	0	0	0	0	0	0	0	0	0	0	0	0	0	0	0	0	0	0	3.02589	5.7584	0	0	0	0	0	0	0	0	0	0	0	0	0	0	0	0	0	0	0	0	0	0
Souris	June	Submerged	0	0	0	0	0	0	0	0	0	0	0	0	0	0	0	0	0	0.529256	0	0	0	3.19751	5.55845	0	0	0.473381	0	0	0	0	0.374241	0	0.40996	0	0	0	0	0	0	0	0	0	0	0	0
Souris	June	Submerged	0	0	0	0	0	0	0	0	0	0	0	0	0	0	0	0	0	0.181012	0	0	0	2.28964	3.96991	0	0	0.181012	0	0	0	0	0.543036	0	0.362024	0	0	0	0	0	0	0	0	0	0	0	0
Souris	June	Submerged	0	0	0	0	0	0	0	0	0	0	0	0	0	0	0	0	0	0.734223	0	0	0	2.43514	4.08798	0	0	0.519174	0.367112	0	0	0	0.635856	0	0.367112	0	0	0	0	0	0	0	0	0	0	0	0
Souris	June	Submerged	0	0	0	0	0	0	0	0	0	0	0	0	0	0	0	0	0	0	0	0	0	2.59743	4.58143	0	0	0.335326	0	0	0	0	0	0	0.387202	0	0	0	0	0	0	0	0	0	0	0	0
Souris	June	Submerged	0	0	0	0	0	0	0	0	0	0	0	0	0	0	0	0	0	0	0	0	0	2.66187	4.6134	0	0	0	0.231249	0	0	0	0.283221	0	0.365636	0	0	0	0	0	0	0	0	0	0	0	0
Mill	July	Submerged	0	0	0	0	0	0	0	0	0	0	0	0	0	0	0	0	0.573539	0.619493	0	0	0	0.405554	0.405554	0	0	0	0	0	0	0	0.331133	0	0.468293	0	0	0	0	0	0	0	0	0	0	0	0.234146
Mill	July	Submerged	0	0	0	0	0	0	0	0	0	0	0	0	0	0	0	0	0.489311	0.489311	0	0	0	0.799042	0	0	0	0.489311	0	0	0	0	0.69199	0.282504	0	0	0	0.282504	0	0	0.489311	0	0	0.282504	0	0	0
Mill	July	Submerged	0	0	0	0	0	0	0	0	0	0	0	0	0	0	0	0	0.285056	0	0	0	0	0.465494	0.822885	0.232747	0	0.637404	0	0	0.855167	0	0.717375	0.43543	0.164577	0	0	0	0	0	0	0.329154	0	0.285056	0	0.368005	0
Mill	July	Submerged	0	0	0	0	0	0	0	0	0	0	0	0	0	0	0	0	0.671156	0	0	0	0	0.866459	0	0	0	0.474579	0	0	0	0	0.547997	0.612679	0	0	0	0	0	0	0	0	0	0	0	0.612679	0
Mill	July	Submerged	0	0	0	0	0	0	0	0	0	0	0	0	0	0	0	0	0.28421	0.602901	0	0	0	0.28421	0.200967	0.200967	0	0	0	0	0.28421	0	0	0.28421	0.200967	0	0	0	0	0	0	0	0	0.200967	0	0	0

## Sheet: 2014
Data are square-root transformed
Site	Week	Type	N. obsoletus	Hydrobiidae	Cerithiidae	Pyramidellidae	Acteocina sp.	Littorina spp	Unidentified Freshwater Snail (not in Table 2)	Astyris lunata	Marginellidae	G. mucronatus	G. lawrencianus	G. oceanicus	Corophiidae	Ampithoidae	Jaera spp.	Chironomini	Nereidae	Capitellidae	Nephtys sp.	Orbinidae	Spionidae	Mya arenaria	Gemma gemma	Mytilidae	Semibalanus balanoides	Nitidulidae	Forficulidae	Curculionidae	Salticidae
Wheatley	1	Submerged	0.192951	0.92536	2.28303	0.945263	0.136437	1.75256	0	0	0	0.45251	3.68127	0.610165	0.610165	0	1.22033	0.236316	0.431452	0	0.272874	0	0.192951	0	0	0	0	0.360978	0	0	0
Wheatley	1	Submerged	0.31046	1.47264	0.537733	0.956903	0	1.6428	0	0	0	0.85023	3.85271	0	0.31046	0	0.490881	0	0.31046	0	0.219529	0	0.380235	0	0	0.219529	0.380235	0.62092	0	0	0
Wheatley	1	Submerged	0.211289	0.944911	0.559017	0.597614	0	1.52362	0	0.149404	0	0.472456	2.20085	0	0	0	0	0.149404	0	0	0	0	0	0	0	0	0	1.3195	0	0	0
Wheatley	1	Submerged	0	1.68059	0.404639	0.671019	0	1.87624	0	0	0	0.286123	2.37672	0.85837	0	0	0.881891	0.350428	0	0	0	0	0	0	0	0	0	0.809279	0	0	0
Wheatley	1	Submerged	0	1.80698	0.965869	0.535768	0	1.64045	0	0	0	1.00233	2.66541	0.423562	0.189422	0	0.568267	0.189422	0	0.628243	0.189422	0.189422	0	0.189422	0	0	0	0	0.267884	0	0
Wheatley	2	Submerged	0	1.18262	0	0.252136	0	2.15425	0	0	0	0.356575	0	0	0	0	0	0	0	0	0	0	0	0	0	0	0	0	0	0	0
Wheatley	2	Submerged	0.310835	4.59994	0.761387	0.62167	0.310835	2.38757	0	0.538382	0	0.822392	0.822392	0	0	0	0	0	0	0	0	0	0.310835	0	0.310835	0	0	0	0	0	0
Wheatley	2	Submerged	0	3.01422	0	0.343503	0	2.44105	0	0	0	0.242893	0.940721	0	0	0	0	0	0	0	0	0	0	0	0	0	0	0	0	0	0
Wheatley	2	Submerged	0	1.17232	0.255822	0.180894	0	2.68309	0	0	0	0.180894	0	0	0	0	0	0	0	0	0	0	0	0	0	0	0	0	0	0	0
Wheatley	2	Submerged	0.343706	1.16556	0	0.343706	0	2.03339	0	0	0.243037	0.486073	0.343706	0	0	0	0	0	0	0	0	0.243037	0	0	0	0	0	0	0	0	0
Wheatley	3	Submerged	0.134243	3.40671	0.465032	0.189849	0	2.3939	0	0.134243	0	0.880292	0.671217	0	0	0	0.232516	0	0.232516	0	0	0	0	0	0	0	0	0	0	0	0
Wheatley	3	Submerged	0	2.45061	0.32086	0.261981	0	3.00423	0	0	0	0.828457	0	0	0	0	0	0	0	0	0	0	0	0	0	0	0	0	0	0	0
Wheatley	3	Submerged	0.249844	2.97723	1.73097	0	0.249844	3.66343	0	0	0	0.353333	0.790076	0	0	0	0	0	0	0	0	0	0	0	0	0.249844	0	0	0	0	0
Wheatley	3	Submerged	0	4.16778	0.865022	0.516949	0	4.15494	0	0	0	0.326948	0.400427	0	0	0	0	0	0	0	0	0	0	0	0	0	0	0	0	0	0
Wheatley	3	Submerged	0	2.73135	1.22815	0.534196	0	2.58567	0	0.403814	0	0.201907	0	0	0	0	0	0	0	0	0	0	0	0	0	0	0	0	0	0	0
Wheatley	4	Submerged	0.315859	2.93483	0	0	0	2.98539	0	0	0	0.893386	0.482483	0	0	0	0.182362	0.407773	0	0	0	0	0	0	0	0	0	0	0	0	0
Wheatley	4	Submerged	0.158471	3.08917	0.316942	0.633883	0	3.89142	0	0	0	0.388173	0	0	0	0	0	0.501129	0	0	0	0	0	0	0	0	0	0	0	0	0
Wheatley	4	Submerged	0	1.64288	0.212095	0.42419	0	2.31854	0	0.212095	0	1.09183	1.25477	0	0.259762	0	0	0	0	0	0	0	0	0	0	0	0	0	0	0	0
Wheatley	4	Submerged	0	1.08148	0.326077	0.515574	0	2.19951	0	0	0	1.3543	1.393	0	0	0	0	0.43136	0	0	0	0	0	0	0	0	0	0	0	0	0
Wheatley	4	Submerged	0.140303	1.52408	0.140303	0.371208	0	2.0763	0	0	0	1.13983	1.08679	0.140303	0	0	0.280607	0.672871	0.140303	0	0.198419	0	0	0	0	0	0	0	0	0	0
Wheatley	5	Submerged	0	0.988286	1.4374	1.1134	0	3.17295	0	0	0	0.725204	1.16291	0.274101	0.274101	0	1.6216	0	0	0	0	0	0	0	0	0	0	0.193819	0	0	0
Wheatley	5	Submerged	0.240563	2.33854	1.56828	1.02062	0	3.342	0	0	0	0.779512	2.93644	0.900103	0	0	1.22663	0	0.170103	0	0.240563	0.240563	0	0	0	0	0	0	0	0	0
Wheatley	5	Submerged	0	1.20355	1.01718	0.851036	0	2.46024	0	0	0	0.964984	2.57329	0.557134	0	0	1.81959	0.321661	0	0	0.227449	0	0	0	0	0	0	0	0	0	0
Wheatley	5	Submerged	0.164244	0.677194	0.434548	0.837482	0	3.88672	0	0.164244	0	0.232276	2.61761	0.787685	0.232276	0	1.51425	0.164244	0.164244	0	0	0	0	0	0	0	0	0	0	0	0
Wheatley	5	Submerged	0.19139	0.956949	0.234404	0.270666	0	5.06008	0	0	0	1.50092	2.35184	0.331497	0.302614	0	1.29099	0.270666	0	0	0.19139	0	0	0.135333	0	0	0	0	0	0	0
Wheatley	6	Submerged	0.169809	5.66256	3.51714	0	0	6.36727	0	0	0	0	2.73809	0.536983	0.169809	0.169809	0.865859	0.379704	0	0	0.169809	0	0	0.294118	0	0	0	0	0	0	0
Wheatley	6	Submerged	0	1.40488	1.1278	0	0	5.92349	0	0.209427	0	0.296174	2.29416	0.362738	0.936586	0	0.725476	0.209427	0	0	0.209427	0	0	0	0	0	0	0	0	0	0
Wheatley	6	Submerged	0	2.2301	0.807015	0	0	6.43315	0	0	0	1.24071	1.21662	0	1.11505	0	0.486648	0.344112	0	0	0.243324	0	0	0	0	0	0	0	0	0	0
Wheatley	6	Submerged	0.271563	4.9057	3.71025	0	0	6.68508	0	0	0	0.44346	2.44406	0.384048	1.09751	0	0.858757	0.384048	0	0	0.384048	0	0	0	0	0	0	0	0	0	0
Wheatley	6	Submerged	0	2.24983	0.587945	0	0	5.54221	0	0	0	0.41574	2.45955	0	1.17589	0	0.222222	0.351364	0	0	0.222222	0	0	0	0	0	0	0	0	0	0
Wheatley	1	Floating	0	3.52941	0	0	0	1.01885	0.294118	0	0	2.56406	1.9061	0	0	0	0	0	0	0	0	0	0	0	0	0	0	0.588235	0	0	0
Wheatley	1	Floating	0	1.61464	0	0	0	0.49829	0	0	0	1.22056	0.747435	0	0	0	0.249145	0	0.659176	0	0	0	0	0	0	0	0	0.431532	0	0	0
Wheatley	1	Floating	0	0.64766	0	0	0	0	0	0	0	0.960635	0.579284	0	0	0	0	0	0.501675	0	0	0	0	0	0	0	0	0	0	0	0
Wheatley	1	Floating	0	2.35465	0	0	0	0.490979	0	0	0	2.65159	1.3446	0	0	0	0	0	0.200441	0	0	0	0	0	0	0	0	0	0	0	0
Wheatley	1	Floating	0	1.16091	0	0	0	0.670251	0	0	0	1.91931	0.764204	0	0	0	0	0	0	0	0	0	0	0	0	0	0	0.599491	0	0.211952	0
Wheatley	2	Floating	0.269925	3.50903	0	0	0	1.84065	0	0	0	2.51045	0.954331	0	0.190866	0	0.190866	0	0	0	0	0	0	0	0	0	0	0	0	0	0
Wheatley	2	Floating	0	2.64167	0	0	0	0.808844	0	0	0	0.86669	2.45137	0	0	0	0	0	0.155662	0	0	0	0	0	0	0	0	0	0	0	0
Wheatley	2	Floating	0.227832	1.12771	0	0	0	0.394617	0	0	0	2.60766	1.12771	0	0	0	0	0	0.161102	0	0	0	0	0	0	0	0	0	0	0	0
Wheatley	2	Floating	0	4.18779	0.459946	0	0	0.79665	0	0.325231	0	1.61964	0.908321	0	0	0.290896	0	0	0	0	0	0	0	0	0	0	0	0	0	0	0
Wheatley	2	Floating	0	1.28283	0	0	0	2.29175	0	0	0	1.72516	0.724714	0	0.264628	0	0	0	0	0	0	0	0	0	0	0	0	0	0	0	0
Wheatley	5	Floating	0.161437	1.42578	0	0.161437	0	2.88336	0	0	0	2.12951	0.823172	0	0.161437	0	0	0	0.228307	0	0	0	0	0	0	0	0	0	0	0	0.161437
Wheatley	5	Floating	0	0.780604	0	0	0	0.581828	0	0	0	3.6798	0	0	0	0	0	0	0.36798	0	0	0	0	0	0	0	0	0	0	0	0
Wheatley	5	Floating	0	0.777087	0	0.141876	0	3.48681	0	0	0	3.65589	0.695048	0	0.317245	0	0	0	0.375369	0	0	0	0	0	0	0	0	0	0	0	0
Wheatley	5	Floating	0	0.83971	0	0	0	3.29449	0	0	0	4.51361	3.34004	0	0.419855	0	0.15869	0	0.274859	0	0	0	0	0	0	0	0	0	0	0	0
Wheatley	5	Floating	0	3.32202	0	0	0	6.26357	0	0	0	3.46752	1.15176	0.168002	0.504006	0	0.5572	0	0	0	0	0	0	0	0	0	0	0	0	0	0
Wheatley	6	Floating	0	3.51322	0	0	0	1.32004	0	0	0	2.11022	0.311136	0	0	0.220006	0	0	0	0	0	0	0	0	0	0	0	0	0	0	0
Wheatley	6	Floating	0	5.98192	0	0	0	1.89165	0	0	0	2.69321	0.695384	0	0	0	0.310985	0	0	0	0	0	0	0	0	0	0	0	0	0	0
Wheatley	6	Floating	0	3.62778	0	0	0	1.48413	0	0	0	1.1254	0	0	0	0	0	0	0	0	0	0	0	0	0	0	0	0	0	0	0
Wheatley	6	Floating	0	3.03554	0	0	0	1.60249	0	0	0	1.43682	0.388661	0	0.224394	0	0	0	0	0	0	0	0	0	0	0	0	0	0	0	0
Wheatley	6	Floating	0	6.3059	0	0	0	2.08438	0	0	0	2.39661	0.383765	0	0	0	0	0	0	0	0	0	0	0	0	0	0	0	0	0	0
